# Supplementary material
Source: MDPI journal article supplement (https://www.mdpi.com/2073-4395/13/7/1843)
Supplement: s1 [file s1]

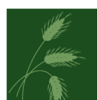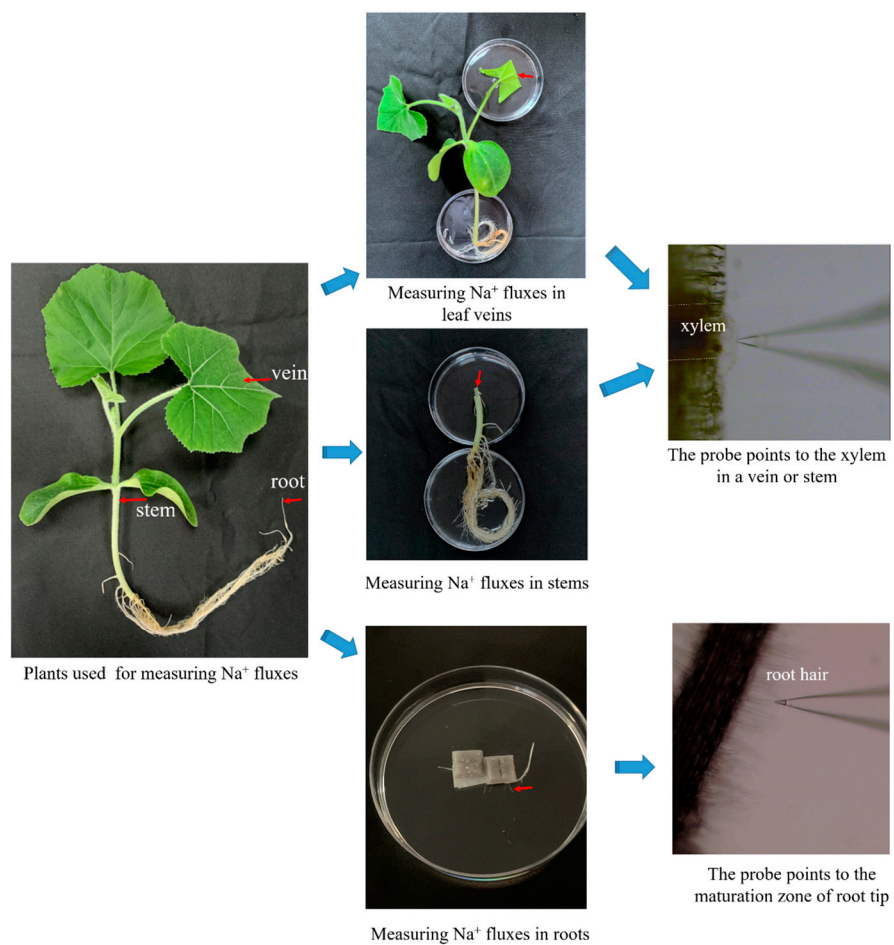

**Figure S1.** Measurement position of ion flux in the roots, stems and leaf veins of *Cucurbit*.

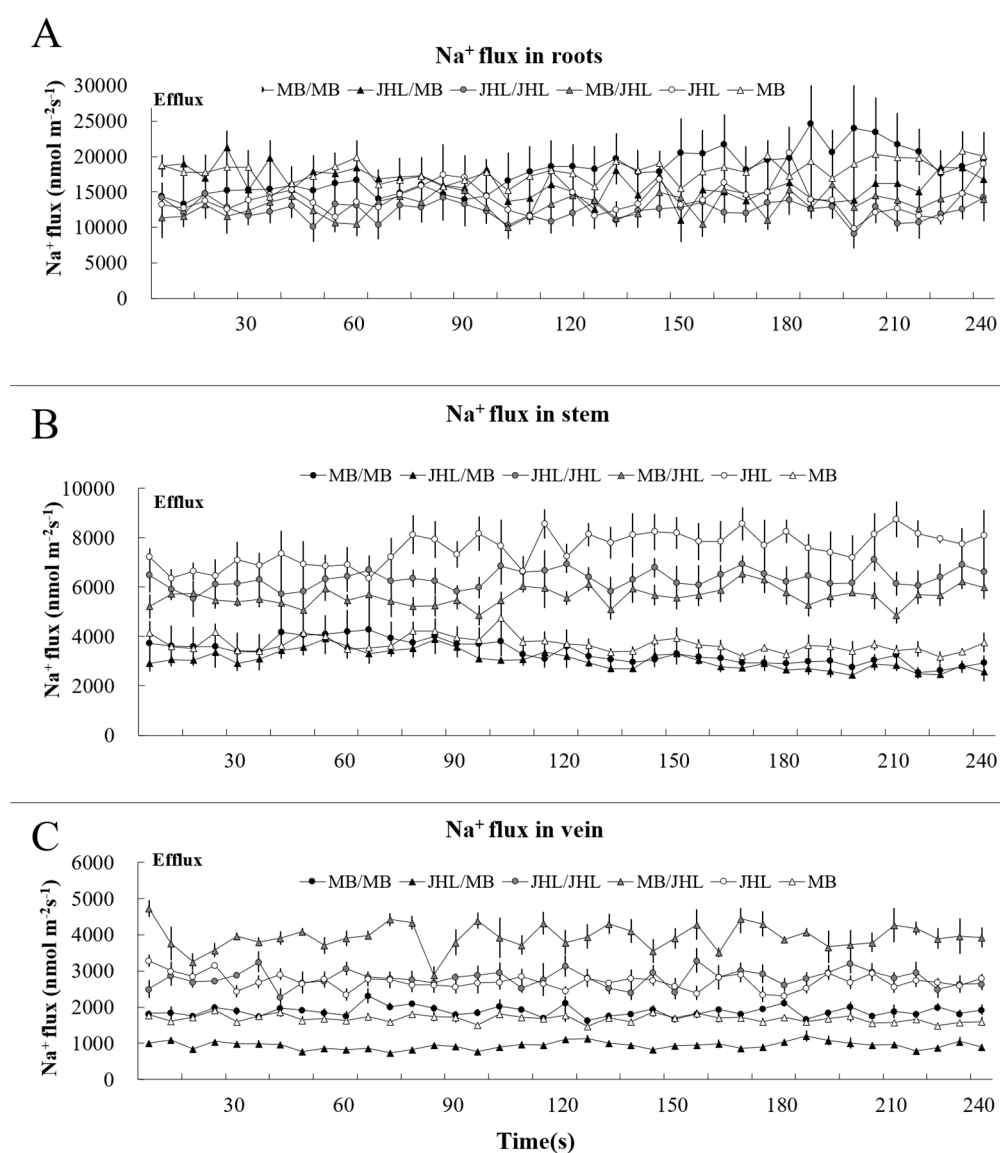

**Figure S2.** A four-minute continuous Na<sup>+</sup> flux recording was conducted using non-invasive micro-test technology (NMT) with roots (A), stems (B) and leaf veins (C) of four grafting combinations (JHL/JHL (*C. maxima* self-grafted), JHL/MB (*C. maxima* scion grafted on *C. moschata* rootstock), MB/MB (*C. moschata* self-grafted) and MB/JHL (*C. moschata* scion grafted on *C. maxima* rootstock) and two non-grafted seedlings (JHL and MB).

**Table S1.** List of primer sequences used for qRT-PCR analysis

| Genes       | Forward Primer        | Reversed Primer      |
|-------------|-----------------------|----------------------|
| <i>SOS1</i> | TGGCGGTGATGACATTAGGA  | CCTTCGCTTCCAAGAAGTCC |
| <i>HKT1</i> | ACTCCTCATCATCACCACCC  | ATGCTTAGCTCATCGACGGT |
| <i>NHX6</i> | GAGGTTCAACTGGTACGATGC | TGCAGTGCTCTCATGGAAGT |
| <i>EF1a</i> | GCCTCAAAGTCCAAGGATGA  | GGCTCCTTCTCGAGTTCTT  |

All primers were designed based on a published mRNA on Cucurbit Genomics Database (<http://cucurbitgenomics.org>) using Primer 5 software. *EF1a* is the reference gene for qRT-PCR analysis.
